# Supplementary material
Source: PubMed Central journal article supplement (PMC6353564)

## Supplementary Online Content

Acharya T, Aspelund T, Jonasson TF, et al. Association of Unrecognized Myocardial Infarction With Long-term Outcomes in Community-Dwelling Older Adults: The ICELAND MI Study. *JAMA Cardiol*. Published online October 10, 2018. doi:10.1001/jamacardio.2018.3285

eFigure. Subgroup analysis showing the hazard ratios of all-cause mortality in unrecognized and recognized myocardial infarction compared to no myocardial infarction. Hazard ratios for sex categories are adjusted for age and diabetes. Hazard ratios for diabetes categories are adjusted for age and sex. Hazard ratios for age categories are adjusted for sex and diabetes. All the other hazard ratios are adjusted for age, sex, and diabetes.

This supplementary material has been provided by the authors to give readers additional information about their work.

**eFigure.** Subgroup analysis showing the hazard ratios of all-cause mortality in unrecognized and recognized myocardial infarction compared to no myocardial infarction. Hazard ratios for sex categories are adjusted for age and diabetes. Hazard ratios for diabetes categories are adjusted for age and sex. Hazard ratios for age categories are adjusted for sex and diabetes. All the other hazard ratios are adjusted for age, sex, and diabetes.

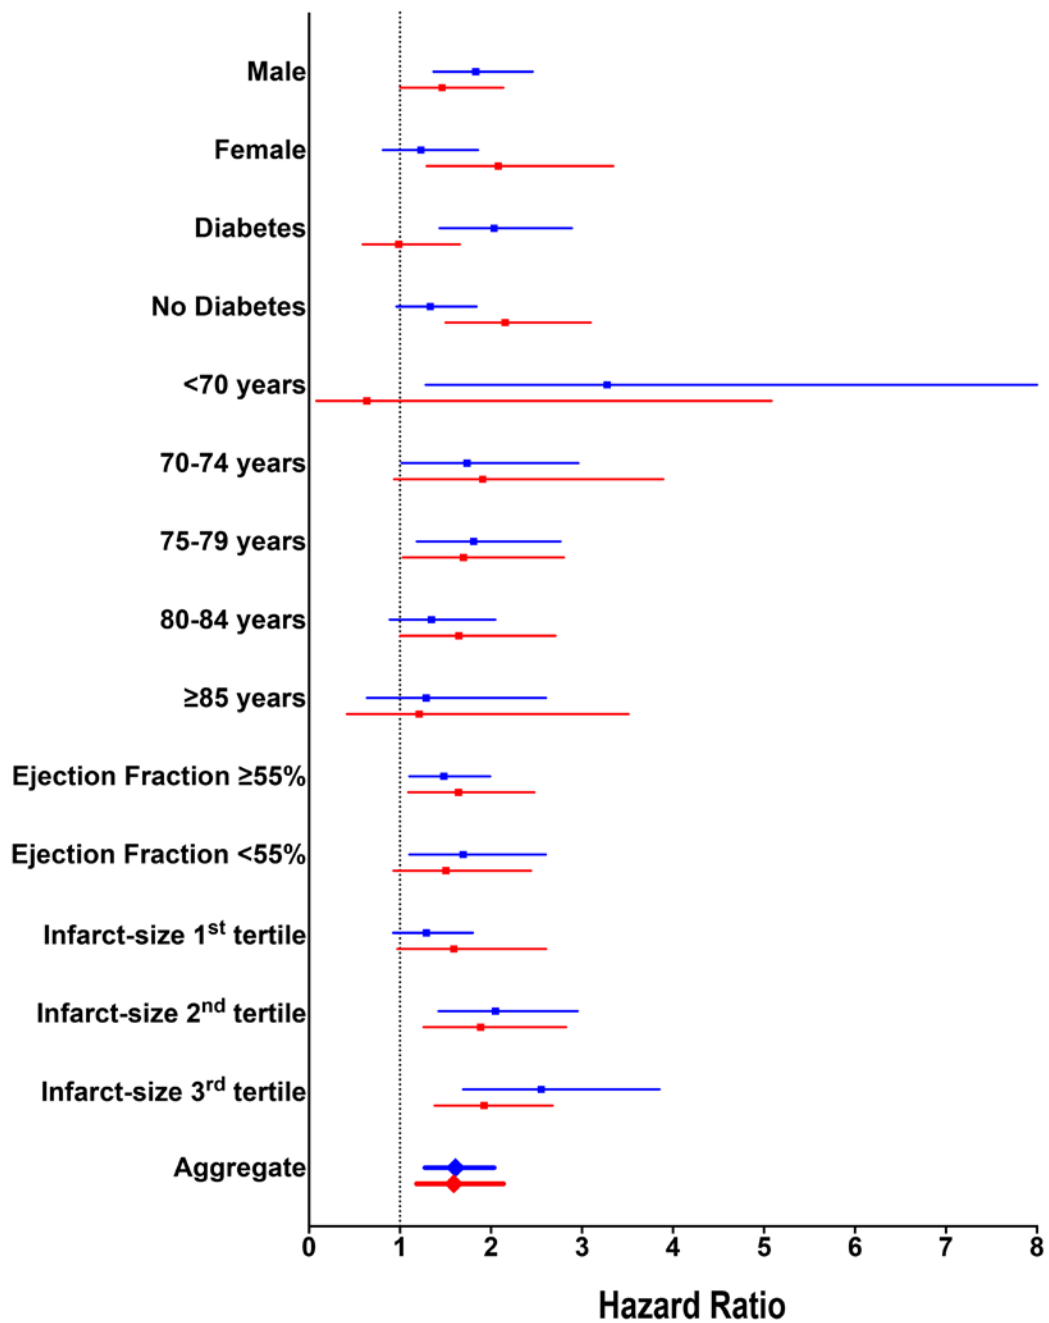

Supplement: NIHMS1001146-supplement-Supplemental_1.pdf [file NIHMS1001146-supplement-Supplemental_1.pdf]
