# Supplementary material
Source: PubMed Central journal article supplement (PMC6353564)
Supplement: NIHMS1001146-supplement-Supplemental_2.pdf [file NIHMS1001146-supplement-Supplemental_2.pdf]

## Supplementary Online Content

Acharya T. Association of Unrecognized Myocardial Infarction With Long-term Outcomes in Community-Dwelling Older Adults: The ICELAND MI Study. *JAMA Cardiol.* Published online October 10, 2018. doi:10.1001/jamacardio.2018.3285

Data Sharing Statement.

This supplementary material has been provided by the authors to give readers additional information about their work.

Data Sharing Statement

**Data**

**Data available:** No
